# Attenuation of Lung Inflammation by Adrenergic Agonists in Murine Acute Lung Injury

Vinay K. Dhingra, M.D.,\* Ari Uusaro, M.D., Ph.D.,† Cheryl L. Holmes, M.D.,‡ Keith R. Walley, M.D.§

**Background:** Acute lung injury leading to a systemic inflammatory response greatly increases mortality in critically ill patients. Cardiovascular management of these patients frequently involves  $\beta$ -adrenergic agonists. These agents may alter the inflammatory response. Therefore, the authors tested the hypothesis that  $\beta$ -adrenergic agonists alter the pulmonary inflammatory response during acute lung injury in mice.

**Methods:** Five-week-old CD-1 mice received continuous infusions of  $10 \mu\text{g} \cdot \text{kg}^{-1} \cdot \text{min}^{-1}$  dobutamine,  $6 \mu\text{g} \cdot \text{kg}^{-1} \cdot \text{min}^{-1}$  dopexamine, or vehicle *via* intraperitoneal mini osmotic pumps, followed immediately by intratracheal instillation of approximately  $2 \mu\text{g}/\text{kg}$  endotoxin (or phosphate-buffered saline control). Six hours later the mice were killed, and lung lavage was performed. Interleukin-6 and -10 concentrations in lung homogenates were measured using enzyme-linked immunosorbent assay. Interleukin-6 and macrophage inflammatory protein-2 mRNA was measured using reverse-transcription polymerase chain reaction.

**Results:** Interleukin-6 protein and mRNA significantly increased after intratracheal endotoxin ( $P < 0.001$ ), and the fraction of neutrophils in lung lavage fluid increased in endotoxin-treated ( $41 \pm 25\%$ ) versus control mice ( $2 \pm 4\%$ ,  $P < 0.05$ ). Treatment of endotoxin mice with dobutamine significantly decreased interleukin-6 protein ( $P < 0.05$ ) and mRNA ( $P < 0.05$ ) expression. Dopexamine had similar but less pronounced effects. Dobutamine decreased interleukin-10 expression, whereas dopexamine did not. In endotoxemic mice, both dobutamine and dopexamine decreased induction of macrophage inflammatory protein-2 mRNA ( $P < 0.05$ ) and reduced the fraction of neutrophils in lung lavage fluid ( $P < 0.05$ ).

**Conclusions:** In endotoxin-induced acute lung injury,  $\beta$ -adrenergic agonists can significantly decrease proinflammatory cytokine expression, decrease induction of chemokine mRNA, and decrease the resultant neutrophil infiltrate in the lung.

POSTOPERATIVE and nonsurgical acute lung injury is a common reason for admission to intensive care units. Acute lung injury leads to a systemic inflammatory response that can cause the acute respiratory distress syndrome (ARDS) and multiple organ failure.<sup>1,2</sup> The presence of ARDS or multiple organ failure increases the mortality of the underlying disease substantially.<sup>3-5</sup> Ad-

renergic agents, including  $\alpha$ ,  $\beta$ , and dopaminergic agonists, are commonly used in critically ill patients with ARDS and multiple organ failure for hemodynamic support by affecting cardiac output, vasomotor tone, and splanchnic blood flow.<sup>6</sup> More recent evidence shows that these vasoactive substances may have a direct effect on cytokine release and may influence the inflammatory response.<sup>7</sup>  $\beta$ -Adrenergic receptor agonists both in *in vitro* and *in vivo* experiments have diminished endotoxin-induced tumor necrosis factor  $\alpha$  (TNF- $\alpha$ ) production<sup>8-11</sup> and have attenuated the increase in permeability in the lungs and liver.<sup>12</sup>  $\beta_2$ -Adrenergic agonists also reduce hepatic cellular injury in a porcine model of sepsis.<sup>13</sup>

Whether  $\beta$ -Adrenergic agonists modify the pulmonary inflammatory response to acute lung injury is not known. Therefore, we tested the hypothesis that dobutamine and dopexamine alter the endotoxin-induced pulmonary inflammatory response, focusing on early proinflammatory cytokine expression, induction of chemokines, and subsequent leukocyte infiltration.

To accomplish this, we first determined the effect of dobutamine and dopexamine on endotoxin-induced early inflammatory cytokine expression in the lung. Specifically, we measured interleukin-6 as an important representative early proinflammatory cytokine<sup>14</sup> that, among many measured proinflammatory cytokines, is best correlated with clinical outcome of ARDS and multiple organ failure.<sup>14-16</sup> We chose to measure interleukin-10 as a representative antiinflammatory cytokine.<sup>14</sup> Proinflammatory cytokines induce chemotactic cytokine (chemokine) production. Therefore, we next looked for evidence of induction of chemokines in the lung by measuring macrophage inflammatory protein-2 (MIP-2) mRNA. MIP-2 is the murine C-X-C chemokine functionally analogous to human interleukin-8,<sup>14</sup> which is an important chemokine predicting severity and outcome in human ARDS.<sup>17,18</sup> Chemokines result in leukocyte infiltration in the lung. Therefore, we measured the percent neutrophils in bronchoalveolar lavage as a clinically relevant response to this pulmonary inflammatory response.

## Methods

### Animal Model

These experiments were approved by the University of British Columbia Animal Care Committee and conform to Canadian and National Institutes of Health guidelines regarding animal experimentation.

\* Clinical Assistant Professor, ‡ Fellow in Critical Care Medicine, § Professor, University of British Columbia Program of Critical Care Medicine and McDonald Research Laboratories, St. Paul's Hospital. † Clinical Assistant Professor, Department of Anesthesiology and Intensive Care, University of Kuopio.

Received from the University of British Columbia Program of Critical Care Medicine and McDonald Research Laboratories, St. Paul's Hospital, Vancouver, British Columbia, Canada, and the Department of Anesthesiology and Intensive Care, University of Kuopio, Kuopio, Finland. Submitted for publication May 18, 2000. Accepted for publication April 18, 2001. Supported by the Canadian Institutes of Health Research, Ottawa, Ontario, Canada. Dr. Walley is a British Columbia Lung Association/St. Paul's Hospital Foundation Scientist, Vancouver, British Columbia, Canada.

Address reprint requests to Dr. Walley: University of British Columbia McDonald Research Laboratories, St. Paul's Hospital, 1081 Burrard Street, Vancouver, British Columbia, Canada V6Z 1Y6. Address electronic mail to: kwwalley@mrl.ubc.ca. Individual article reprints may be purchased through the Journal Web site, www.anesthesiology.org.

All experiments were conducted in outbred 5-week-old female CD-1 mice given food and water *ad libitum*. Mice were anesthetized with inhaled 3% halothane while breathing spontaneously. Intraperitoneal pumps (Alzet, Newark, DE) delivering continuous infusions of dobutamine at  $1 \mu\text{l/h}$  ( $10 \mu\text{g} \cdot \text{kg}^{-1} \cdot \text{min}^{-1}$ ), dopexamine ( $6 \mu\text{g} \cdot \text{kg}^{-1} \cdot \text{min}^{-1}$ ), or vehicle (5% dextrose to control for surgical manipulation) were inserted through a 1-cm midline abdominal incision that was closed in two layers using interrupted 5.0 silk sutures. These drug infusion doses have approximately equivalent hemodynamic effects<sup>19</sup> and were chosen to represent a moderate to high dose in humans to be relevant to clinical practice. For example, a  $1,500 \mu\text{g/kg}$  single intraperitoneal injection of dobutamine in mice increased heart rate by approximately 25% and increased velocity of myocardial circumferential fiber shortening by 60%,<sup>20</sup> suggesting that our intraperitoneal infusion of  $10 \mu\text{g} \cdot \text{kg}^{-1} \cdot \text{min}^{-1}$  dobutamine was not excessively high. An intravenous infusion of  $2 \mu\text{g} \cdot \text{kg}^{-1} \cdot \text{min}^{-1}$  dobutamine in mice increased heart rate by approximately 80%,<sup>21</sup> suggesting that our intraperitoneal infusion of  $10 \mu\text{g} \cdot \text{kg}^{-1} \cdot \text{min}^{-1}$  dobutamine was not excessively low.

Five minutes after pump insertion and while mice were still anesthetized with 3% halothane,  $40 \mu\text{l}$  of  $1.5 \text{ mg/ml}$  endotoxin (lipopolysaccharide, Sigma Chemicals, Oakville, Ontario, Canada) in phosphate-buffered saline (PBS) or  $40 \mu\text{l}$  of endotoxin-free PBS alone was instilled intratracheally. The mice were then allowed to recover in room air. Six hours after endotoxin or PBS instillation, the mice were anesthetized with 5% halothane and killed by rapid exsanguination by cardiac puncture. This 6-h time point was chosen based on preliminary studies that demonstrated that the maximal proinflammatory cytokine concentrations after endotoxin administration occurred at this time. In some mice, a lung lavage was performed using 1 ml PBS, and leukocyte differential counts were determined on Wright-stained cytopins. In other mice, the right lung was excised, frozen in liquid nitrogen, and stored at  $-70^\circ\text{C}$  for subsequent enzyme-linked immunosorbent assay (ELISA) measurements while the left lung was used to measure mRNA using reverse-transcription polymerase chain reaction.

#### *Cytokine Enzyme-linked Immunosorbent Assays*

The lung samples were homogenized in 1 ml of ice-cold PBS and then centrifuged at 1,500 rpm for 10 min at  $4^\circ\text{C}$ . Entire right lungs were used for the ELISA measurements to allow comparison of equivalent samples between groups. The supernatant was subsequently stored at  $-20^\circ\text{C}$ . Antigenic interleukin-6 and -10 concentrations were measured in lung homogenates using sandwich ELISAs (Pharmingen, San Diego, CA). The lower detection limit for both interleukin-6 and -10 ELISAs was 60 pg/ml. ELISA plates were incubated at  $4^\circ\text{C}$  overnight

with  $50 \mu\text{l}$  per well of desired capture antibody. Plates were washed four times, and nonspecific binding was blocked using  $200 \mu\text{l}$  of PBS with 2% bovine serum albumin per well for 90 min. Plates were washed four times followed by incubation of  $50 \mu\text{l}$  of diluted cell-free supernatant for 3 h at room temperature. The sample was replaced with  $50 \mu\text{l}$  ( $1 \mu\text{g/ml}$ ) of the paired biotinylated antibody and incubated for 60 min. Avidin-peroxidase conjugate was added (Bio-Rad Laboratories, Hercules, CA) followed by chromagen substrate (OPD; Dako, Mississauga, Ontario, Canada). Plates were read at 490 nm using an ELISA plate reader (Rainbow Reader; SLT Lab Instruments, Salzburg, Austria).

#### *Reverse-Transcription Polymerase Chain Reaction*

Total cellular RNA was isolated from snap frozen lungs by phenol chloroform extraction. RNA was ethanol precipitated and dissolved in diethyl pyrocarbonate-treated water, and total RNA concentration was determined by spectrophotometry. Five micrograms of RNA was reverse transcribed (SuperScript II reverse transcriptase; Gibco BRL, Burlington, Ontario, Canada) using oligo(dT)12-18 primers (Gibco BRL). The cDNA was amplified by PCR using specific primers for interleukin-6, MIP-2, and glyceraldehyde-3-phosphate dehydrogenase (GAPDH) using optimized protocols. Primers for interleukin-6 were 5' GAT GCT ACC AAA CTG GAT ATA ATC 3' and 5' GGT CCT TAG CCA CTC CTT CTG TG 3'.<sup>22</sup> Primers for MIP-2 were 5' GCT-GGC-CAC-CAA-CCA-CCA-GG 3' and 5' AGC-GAG-GCA-CAT-CAG-GTA-CG 3'. Primers for GAPDH, a reporter mRNA, were 5' CCC ATC ACC ATC TTC CAG 3' and 5' ATG ACC TTG CCC ACA GCC 3'. The reverse-transcribed cDNA ( $0.5 \mu\text{g}$  in  $2 \mu\text{l}$ ) was added with specific cytokine primer pairs to a PCR mix with 1 U Taq DNA polymerase (Gibco BRL) in a  $20\text{-}\mu\text{l}$  reaction volume. PCR for interleukin-6 and GAPDH used 38 cycles of  $95^\circ\text{C}$  for 30 s,  $60^\circ\text{C}$  for 45 s, and  $72^\circ\text{C}$  for 30 s followed by one cycle of  $72^\circ\text{C}$  for 6 min. This number of cycles was chosen because all three PCRs were in their exponential phase of amplification. PCR products were identified by electrophoresis on a 2% agarose gel containing  $0.2 \mu\text{g}$  of ethidium bromide per milliliter. The resulting image was captured (Eagle Eye; Stratagene, La Jolla, CA) and densitometry performed using an automated gel imaging system (Image PC; Scion Corporation, Frederick, MD).

#### *Lung Wet Weight/Dry Weight Ratio*

In a second identical series of experiments, the right lung was excised, blotted dry, and weighed to obtain wet weight. The lung was then dried at  $60^\circ\text{C}$  and weighed daily. After 48 h, no further change in weight was observed in any sample. This weight was taken as dry weight for the calculation of the wet weight/dry weight ratio.

*Arterial and Mixed Venous Oxygen Saturation*

In this second series of experiments, arterial blood was withdrawn from the left ventricle within 10 s of induction of anesthesia and thoracotomy at the end of the experiment. The mice were spontaneously breathing room air (fraction of inspired oxygen [F<sub>IO<sub>2</sub></sub>] = 0.21) so that this measure reflects lung oxygen exchange. Oxygen saturation was measured using a co-oximeter (IL482; Instrumentation Laboratories, Lexington, MA).

In an additional series of experiments, venous blood was similarly withdrawn from the right ventricle at the end of the experiment. The mice were spontaneously breathing 100% F<sub>IO<sub>2</sub></sub>, which resulted in an arterial oxygen saturation of greater than 0.96 in all groups. This mixed venous oxygen saturation reflects the balance between whole body oxygen consumption and whole body oxygen delivery.

*Data Analysis*

Raw data were tested using a Kolmogorov-Smirnov test and found not to differ significantly from a normal distribution. Therefore, analysis of variance was used to test for differences between groups in measured variables, with *P* < 0.05 indicating significance. When significant, we identified specific differences between groups using sequentially rejective Bonferroni tests for multiple comparisons. Data are expressed as mean ± SD throughout the text, table, and figures.

**Results**

Interleukin-6 expression in the lungs increased at 6 h after endotoxin intratracheal instillation in the endotoxin control groups (*P* < 0.001, fig. 1). Consistent with this, endotoxin intratracheal instillation resulted in a marked increase in interleukin-6 mRNA expression in the endotoxin control group (*P* < 0.05, fig. 2). Compared with the endotoxin-induced increase observed in endotoxin controls (lipopolysaccharide/control in fig. 1), dobutamine decreased interleukin-6 expression by 45% (*P* < 0.05) and decreased interleukin-6 mRNA by 53% (*P* < 0.05, fig. 2). Compared with endotoxin controls, dopexamine infusion in endotoxic mice decreased interleukin-6 protein expression by 29% (*P* = nonsignificant, fig. 1) and decreased interleukin-6 mRNA by 54% (*P* < 0.05, fig. 2). In further control experiments not receiving endotoxin intratracheally, dobutamine and dopexamine did not alter interleukin-6 protein or mRNA expression, or any of the experimental measures, compared with the PBS-control group.

To determine whether reduced interleukin-6 protein and mRNA expression after dobutamine infusion is caused by increased antiinflammatory cytokine expression, we measured interleukin-10 concentration in the lungs. Similar to previous observations in other models

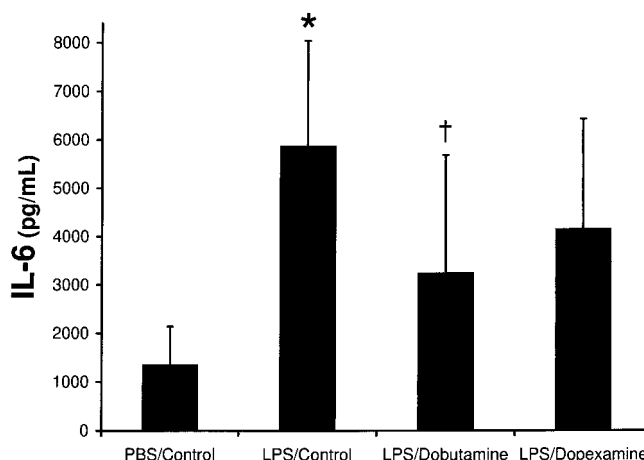

**Fig. 1.** The mean concentration of interleukin-6 (IL-6) in lung homogenates, measured using enzyme-linked immunosorbent assay, is shown (error bar is SD). Compared with phosphate-buffered saline (PBS)/control (n = 6), intratracheal endotoxin (lipopolysaccharide [LPS]/control, n = 12) increased lung interleukin-6 concentration (\**P* < 0.05). Dobutamine infusion decreased this effect of endotoxin (LPS/Dobutamine, n = 13, †*P* < 0.05), whereas dopexamine had a lesser effect (LPS/Dopexamine, n = 13, *P* = nonsignificant).

of sepsis,<sup>22</sup> pulmonary interleukin-10 is constitutively expressed in the control group and does not significantly increase after endotoxin administration (fig. 3). However, dobutamine infusion decreased pulmonary interleukin-10 expression by 70% (*P* < 0.05), whereas dopexamine infusion had no significant effect (fig. 3). Thus, increased interleukin-10 cannot account for dobutamine-induced decreases in interleukin-6 mRNA and protein expression after endotoxin administration.

Early proinflammatory cytokines cause induction of chemokines. To test whether β-adrenergic agonist-in-

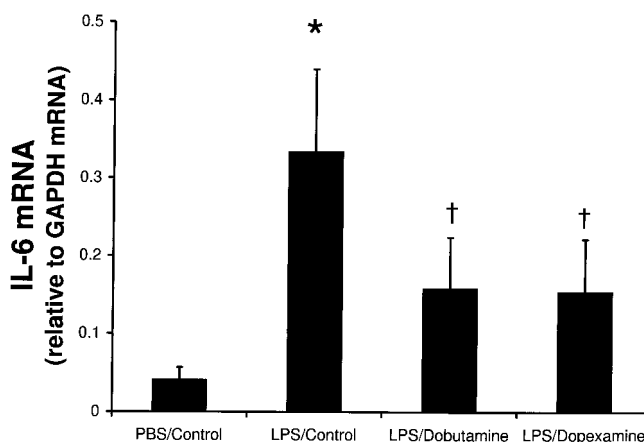

**Fig. 2.** Mean densitometry of interleukin-6 (IL-6) mRNA (divided by control glyceraldehyde-3-phosphate dehydrogenase [GAPDH] mRNA) in lung extracts, measured using reverse-transcription polymerase chain reaction, is shown (error bar is SD). Compared with control (n = 4), intratracheal endotoxin (n = 6) increased lung IL-6 mRNA expression (\**P* < 0.05). Dobutamine (n = 6) and dopexamine (n = 6) infusion decreased this effect of endotoxin (†*P* < 0.05). PBS = phosphate-buffered saline; LPS = lipopolysaccharide.

Downloaded from http://aesa2.silverchair.com/anesthesiology/article-pdf/95/4/947/4044610000542-200110000-0025.pdf by guest on 17 April 2024

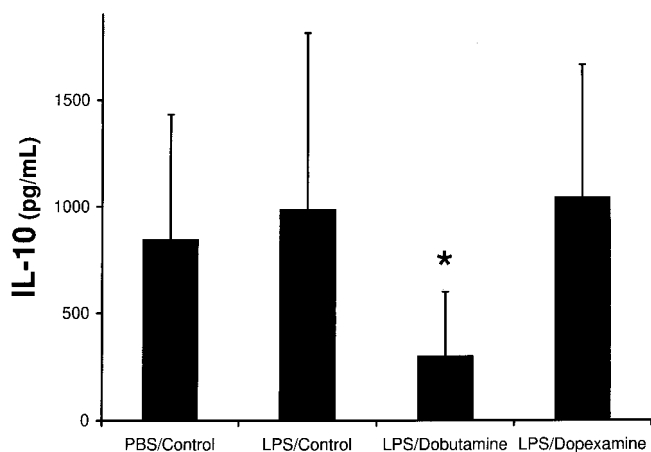

**Fig. 3.** The mean concentration of interleukin-10 (IL-10) in lung homogenates, measured using enzyme-linked immunosorbent assay, is shown (error bar is SD). Compared with phosphate-buffered saline (PBS)/control (n = 6), intratracheal endotoxin (lipopolysaccharide [LPS]/control, n = 12) did not significantly alter pulmonary IL-10 concentration. However, dobutamine infusion significantly decreased pulmonary IL-10 in endotoxemic mice (n = 13, \* $P < 0.05$ ), whereas dopexamine did not (n = 13).

duced reductions in interleukin-6 were associated with altered chemokine induction, we measured MIP-2 mRNA expression. Intratracheal endotoxin increased MIP-2 mRNA ( $P < 0.05$ , fig. 4). Both dobutamine and dopexamine infusion starting immediately before intratracheal endotoxin significantly attenuated the increases in MIP-2 mRNA ( $P < 0.05$ , fig. 4).

C-X-C chemokines, such as interleukin-8 in humans or MIP-2 in the mouse, are important contributors to increased neutrophil recruitment into the lungs during an inflammatory response. Therefore, we measured the fraction of neutrophils in lung lavage fluid. Intratracheal

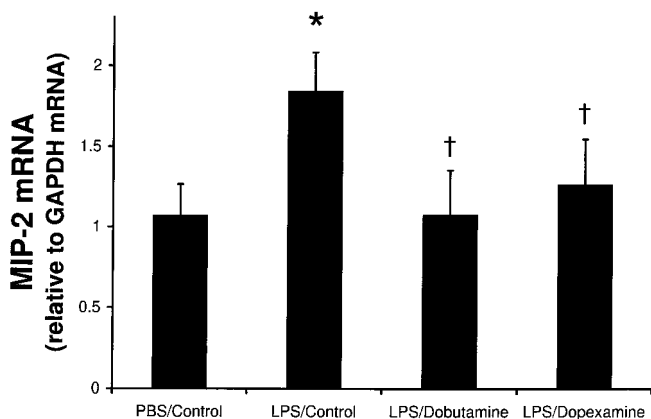

**Fig. 4.** Mean densitometry of MIP-2 mRNA (divided by control glyceraldehyde-3-phosphate dehydrogenase [GAPDH] mRNA) in lung extracts, measured using reverse-transcription polymerase chain reaction, is shown (error bar is SD). Compared with control (n = 4), intratracheal endotoxin (n = 6) increased lung MIP-2 mRNA expression (\* $P < 0.05$ ). Both dobutamine (n = 6) and dopexamine (n = 6) decreased this effect of endotoxin († $P < 0.05$ ). PBS = phosphate-buffered saline; LPS = lipopolysaccharide.

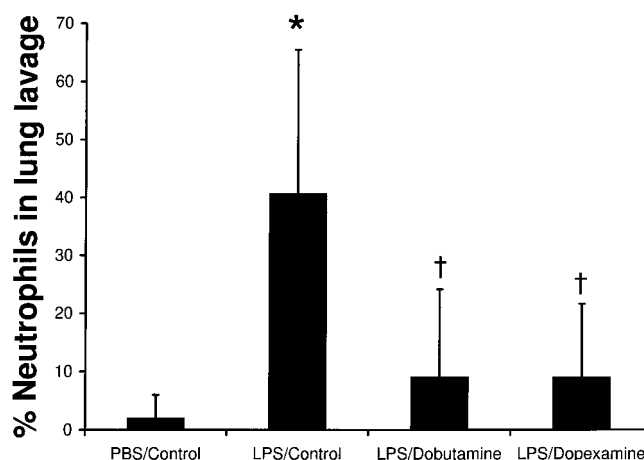

**Fig. 5.** The mean percent neutrophils measured in cytopins of lung lavage fluid is shown (error bar is SD). Compared with control (n = 4), intratracheal endotoxin (n = 5) resulted in an increase in the percent neutrophils (\* $P < 0.05$ ). Both dobutamine (n = 7) and dopexamine (n = 7) infusions decreased this effect of endotoxin († $P < 0.05$ ). PBS = phosphate-buffered saline; LPS = lipopolysaccharide.

endotoxin increased the percent neutrophils in fluid (fig. 5). Dobutamine infusion starting immediately before intratracheal endotoxin significantly attenuated this increase by 78% ( $P < 0.05$ ). Dopexamine infusion also resulted in a 78% decrease ( $P < 0.05$ ) in the percent neutrophils in lung lavage fluid compared with endotoxin controls (fig. 5).

Endotoxin infusion significantly increased the wet weight/dry weight ratio of the lungs (table 1). Treatment with dobutamine or dopexamine did not further alter the wet weight/dry weight ratio after endotoxin infusion. Arterial oxygen saturation on room air was  $86.8 \pm 11.9$  in the control group and  $78.7 \pm 18.8$  in the endotoxin-treated groups ( $P =$  nonsignificant, table 1). When  $F_{iO_2}$  was 1.0, there were no significant differences between groups in mixed venous oxygen saturation.

## Discussion

This murine model of endotoxin-induced acute lung injury results in a significant increase in early proinflammatory cytokines (interleukin-6) and an associated increase in C-X-C chemokine induction as measured by MIP-2 mRNA expression, with the outcome of increased neutrophils in lung lavage fluid and an increased wet weight/dry weight ratio of the lungs. The key new finding of this study is that dobutamine and dopexamine infusion at clinically relevant doses attenuate these important early steps in the pathogenesis of ARDS. Dopexamine had a lesser effect on interleukin-6 protein expression and did not alter pulmonary interleukin-10 expression. In contrast, dobutamine decreased pulmonary interleukin-10 expression after endotoxin adminis-

**Table 1. Lung Wet Weight/Dry Weight Ratio and Oxygen Saturations**

|                                                                         | PBS/Control            | LPS/Control             | LPS/Dobutamine         | LPS/Dopexamine         |
|-------------------------------------------------------------------------|------------------------|-------------------------|------------------------|------------------------|
| Lung wet weight/dry weight ratio                                        | 4.75 ± 0.24<br>(n = 4) | 5.81 ± 1.10*<br>(n = 5) | 5.19 ± 0.71<br>(n = 5) | 4.95 ± 1.12<br>(n = 5) |
| Arterial O <sub>2</sub> saturation (F <sub>IO<sub>2</sub></sub> = 0.21) | 86.8 ± 11.9<br>(n = 4) | 70.3 ± 29.0<br>(n = 4)  | 79.2 ± 18.2<br>(n = 5) | 84.0 ± 11.5<br>(n = 6) |
| Venous O <sub>2</sub> saturation (F <sub>IO<sub>2</sub></sub> = 1.0)    | 65.5 ± 10.1<br>(n = 4) | 56.6 ± 12.1<br>(n = 5)  | 62.0 ± 9.8<br>(n = 4)  | 73.1 ± 10.0<br>(n = 3) |

Mean ± SD.

\* P < 0.05 compared with the PBS/control group.

PBS = intratracheal instillation of phosphate-buffered saline (sham); LPS = intratracheal instillation of lipopolysaccharide; O<sub>2</sub> = oxygen; F<sub>IO<sub>2</sub></sub> = fraction of inspired oxygen.

tration. These potentially beneficial effects were observed when catecholamine infusion was initiated before lung injury.

These novel findings in the lungs extend previous observations. β-Adrenergic agonists attenuate expression of proinflammatory cytokines (TNF-α and interleukin-6) in cell culture<sup>8,23</sup> and in blood<sup>10,11,24</sup> and attenuate ultrastructural changes of solid organs in animal models of sepsis.<sup>13</sup> Inhibition of β-adrenergic effects using propranolol prevents the effects of adrenaline-mediated suppression of TNF-α.<sup>11</sup> The mechanism of this effect appears to be β<sub>2</sub>-adrenergic receptor mediated<sup>23</sup> and involves cyclic adenosine monophosphate.<sup>25</sup> β<sub>2</sub>-Receptor binding activates trimeric G proteins, forming stimulatory G proteins.<sup>13</sup> Stimulatory G proteins then activate adenylyl cyclase, leading to an increase in intracellular cyclic adenosine monophosphate, which subsequently results in formation of protein kinase A. Protein kinase A inhibits both phospholipase C β and mitogen-activated protein kinase. Phospholipase C β, *via* diacylglycerol and by increasing intracellular calcium through inositol triphosphate, causes an increase in gene transcription for inflammatory proteins (cytokines, integrins, and selectins) and inflammatory lipids (leukotrienes, thromboxane, and platelet-activating factor). β-Adrenergic agonists seem to affect both the transcription and translation of interleukin production. For example, Nakamura *et al.*<sup>26</sup> found that modulation by β-adrenergic agonists of interleukin-6 and TNF-α gene transcription and accumulation of mRNA corresponded to altered promoter activity. Jaffe *et al.*<sup>27</sup> have reported inhibition of interleukin-5 transcription in lung fragments treated with isoproterenol. Other investigators have found that β-adrenergic agonists block inflammatory cytokine production at the posttranscriptional level.<sup>9</sup> β-Adrenergic agonists may prevent accumulation of mRNA within microglial cells in culture stimulated by endotoxin.<sup>28</sup>

In contrast, the effect of α-adrenergic receptor stimulation is less clear. Some findings suggest that α-adrenergic receptor stimulation increases proinflammatory cytokine responses.<sup>29-31</sup> Alternatively, van der Poll *et al.*<sup>32</sup> suggested attenuation of inflammation by α-adrenergic agonists.

Much less is known about the effect of β-adrenergic agonists in the lung. We found that dobutamine and dopexamine inhibited pulmonary interleukin-6 protein and mRNA expression in our model of acute lung injury. Dobutamine decreased pulmonary interleukin-10 expression, whereas dopexamine did not. However, both dobutamine and dopexamine decreased endotoxin-induced MIP-2 message and pulmonary leukocyte infiltration. Dobutamine and dopexamine differ primarily in their α<sub>1</sub>-agonist properties. Dobutamine exists as two enantiomers, a positive (+) and a negative (-). The racemic mixture of dobutamine used clinically has β<sub>1</sub>-agonist, β<sub>2</sub>-agonist, and α<sub>1</sub>-agonist properties. Dopexamine, on the other hand, is primarily a β<sub>2</sub> agonist with dopamine receptor-1 and -2 properties. We are uncertain whether the difference between dobutamine and dopexamine is the result of a difference in specific receptor affinity or a difference in effective dose for a specific receptor. It is interesting to note that other mixed α- and β-adrenergic agonists, epinephrine and norepinephrine, attenuate TNF-α production in both *in vitro* and *in vivo* models of sepsis.<sup>32</sup> Our results appear to be consistent with the observations of Spengler *et al.*<sup>31</sup> and van der Poll *et al.*,<sup>32</sup> which suggest that mixed α- and β-adrenergic agonist-like dobutamine may have somewhat different antiinflammatory effects compared with agonists such as dopexamine, which lack α-adrenergic agonist activity. Our observations of differences in interleukin-6- and interleukin-10-modulating effects of dobutamine and dopexamine highlight the results of Tighe *et al.*,<sup>13</sup> who, in a series of experiments with porcine peritonitis, found protective effects from dopexamine and a worsening of hepatic ultrastructural changes with dobutamine. Whether these two adrenergic agents have differential effects on proinflammatory and antiinflammatory cytokines in the liver, as we have observed in the lung, has not yet been described.

Interestingly, we observed a significant decrease in pulmonary interleukin-10 expression after endotoxin exposure in the dobutamine group. Accordingly, dobutamine's effect of decreasing pulmonary interleukin-6 expression could not have been caused by regulation by interleukin-10. In contrast to our results, Suberville *et*

*al.*<sup>33</sup> found that isoproterenol increased interleukin-10 mRNA and protein expression by macrophages, and van der Poll *et al.*<sup>32</sup> found that epinephrine infusion during human endotoxemia increased circulating interleukin-10 concentrations. Our results in the lung may differ from these previously reported effects of adrenergic agonists on interleukin-10 production for several possible reasons. First, regulation of pulmonary interleukin-10 expression is different from blood interleukin-10 expression. Interleukin-10 is normally expressed in high concentrations in the lungs and does not increase substantially even in models of severe sepsis,<sup>22</sup> even though blood interleukin-10 concentrations and interleukin-10 concentrations in cell culture systems increase dramatically. Thus, previous studies of blood levels and production by isolated cell cultures may differ. Second, changes in specific cytokine expression after endotoxin stimulation is differentially regulated,<sup>34,35</sup> and, in particular, increases in interleukin-10 in the blood after endotoxin challenge appears to depend on combined  $\alpha$ - and  $\beta$ -adrenergic stimulation.<sup>32</sup> Furthermore, time of exposure to catecholamines alters outcome. For example, isoproterenol-induced increases in interleukin-10 release from endotoxin-activated mouse peritoneal macrophages occurred only if the mouse was exposed to the  $\beta$ -agonist for at least 2 h before the endotoxin challenge.<sup>33</sup> Similarly, altered interleukin-10 blood concentrations in humans depended on the time of exposure to catecholamine.<sup>32</sup> Thus, the effect of catecholamines on interleukin-10 expression, and interleukin-10 expression in the lungs in particular, may be complex and depend on multiple competing influences.

Conceivably, hemodynamic differences induced by endotoxin, dobutamine, and dexmedetomidine may also contribute to differences in the pulmonary inflammatory response. We chose to measure mixed venous oxygen saturation while  $F_{iO_2}$  was 1.0 (which resulted in oxygen saturation > 0.98; table 1). This provides an estimate of the balance between whole body oxygen consumption and oxygen delivery. Oxygen delivery is directly related to cardiac output since oxygen saturation was high and constant and hemoglobin was almost certainly constant. The observation that there were no significant differences in mixed venous oxygen saturation between the groups suggests that cardiac output differences between the groups may not be a major contributor to differences in the pulmonary inflammatory response. However, mixed venous oxygen saturation as a surrogate measure of cardiac output has significant limitations so that the possibility that changes in systemic and pulmonary hemodynamics may have contributed to differences in the pulmonary inflammatory response must be acknowledged.

In summary, in a murine model of acute lung injury, dobutamine and dexmedetomidine inhibit the pulmonary inflammatory response consisting of early proinflammatory cytokine expression, induction of chemokines, and

infiltration of the lung with neutrophils. Dexmedetomidine had a lesser effect on interleukin-6 protein expression and did not alter pulmonary interleukin-10 concentration, whereas dobutamine decreased pulmonary interleukin-10 expression. These results suggest that clinically used  $\beta$ -adrenergic agonists may have an effect on the pulmonary inflammatory response in human acute lung injury. However, it is important to recognize that the current effects occurred when adrenergic agents were given before endotoxin administration. Therefore, further investigations are necessary to determine whether similar salutary effects are observed when adrenergic agents are initiated after onset of lung injury.

## References

1. Doyle RL, Szaflarski N, Modin GW, Wiener-Kronish JP, Matthay MA: Identification of patients with acute lung injury. *Am J Respir Crit Care Med* 1995; 152:1818-24
2. Matthay MA: The adult respiratory distress syndrome: Definition and prognosis. *Clin Chest Med* 1990; 11:575-80
3. Cox SC, Norwood SH, Duncan CA: Acute respiratory failure: Mortality associated with underlying disease. *Crit Care Med* 1985; 13:1005-8
4. Suchyta MR, Clemmer TP, Elliott CG, Orme JF Jr, Weaver LK: The adult respiratory distress syndrome: A report of survival and modifying factors. *Chest* 1992; 101:1074-9
5. Montgomery AB, Stager MA, Carrico CJ, Hudson LD: Causes of mortality in patients with the adult respiratory distress syndrome. *Am Rev Respir Dis* 1985; 132:485-9
6. Sonnenblick EH, Frishman WH, Lejemtel TH: Dobutamine: A new synthetic cardioactive sympathetic amine. *N Engl J Med* 1979; 300:17-22
7. Pastores SM, Hasko G, Vizi ES, Kvetan V: Cytokine production and its manipulation by vasoactive drugs. *New Horizons* 1996; 4:252-64
8. Hu XX, Goldmuntz EA, Brosnan CF: The effect of norepinephrine on endotoxin-mediated macrophage activation. *J Neuroimmunol* 1991; 31:35-42
9. Severn A, Rapson NT, Hunter CA, Liew FY: Regulation of tumor necrosis factor production by adrenaline and beta-adrenergic agonists. *J Immunol* 1992; 148:3441-5
10. Elenkov IJ, Hasko G, Kovacs KJ, Vizi ES: Modulation of lipopolysaccharide-induced tumor necrosis factor- $\alpha$  production by selective  $\alpha$ - and  $\beta$ -adrenergic drugs in mice. *J Neuroimmunol* 1995; 61:123-31
11. Monastra G, Secchi EF: Beta-adrenergic receptors mediate in vivo the adrenaline inhibition of lipopolysaccharide-induced tumor necrosis factor release. *Immunol Lett* 1993; 38:127-30
12. Youssef HA, Sigurdsson GH, Christenson JT, Owunwanne A: Use of indium-111-labeled transferrin to study plasma extravasation during endotoxin shock and the effects of the beta-2 agonist terbutaline. *Am J Physiol Imaging* 1991; 6:85-9
13. Tighe D, Moss R, Bennett D: Cell surface adrenergic receptor stimulation modifies the endothelial response to SIRS: Systemic Inflammatory Response Syndrome. *New Horizons* 1996; 4:426-42
14. Standiford TJ, Kunkel SL, Greenberger MJ, Laichalk LL, Strieter RM: Expression and regulation of chemokines in bacterial pneumonia. *J Leuk Biol* 1996; 59:24-8
15. Presterl E, Staudinger T, Pettermann M, Lassnigg A, Burgmann H, Winkler S, Frass M, Graninger W: Cytokine profile and correlation to the APACHE III and MPM II scores in patients with sepsis. *Am J Respir Crit Care Med* 1997; 156: 825-32
16. Patel RT, Deen KI, Youngs D, Warwick J, Keighley MR: Interleukin 6 is a prognostic indicator of outcome in severe intra-abdominal sepsis. *Br J Surg* 1994; 81:1306-8
17. Miller EJ, Cohen AB, Nagao S, Griffith D, Maunder RJ, Martin TR, Wiener-Kronish JP, Stichlerling M, Christophers E, Matthay MA: Elevated levels of NAP-1/interleukin-8 are present in the airspaces of patients with the adult respiratory distress syndrome and are associated with increased mortality. *Am Rev Respir Dis* 1992; 146:427-32
18. Matsumoto T, Yokoi K, Mukaida N, Harada A, Yamashita J, Watanabe Y, Matsushima K: Pivotal role of interleukin-8 in the acute respiratory distress syndrome and cerebral reperfusion injury. *J Leuk Biol* 1997; 62:581-7
19. Jaski BE, Peters C: Inotropic, vascular and neuroendocrine effects of dexmedetomidine hydrochloride and comparison with dobutamine. *Am J Cardiol* 1988; 62:63C-7C
20. Tanaka N, Dalton N, Mao L, Rockman HA, Peterson KL, Gottshall KR, Hunter JJ, Chien KR, Ross J Jr: Transthoracic echocardiography in models of cardiac disease in the mouse. *Circulation* 1996; 94:1109-17
21. Cho MC, Rao M, Koch WJ, Thomas SA, Palmiter RD, Rockman HA:

Enhanced contractility and decreased beta-adrenergic receptor kinase-1 in mice lacking endogenous norepinephrine and epinephrine. *Circulation* 1999; 99: 2702-7

22. Walley KR, Lukacs NW, Standiford TJ, Strieter RM, Kunkel SL: Balance of inflammatory cytokines related to severity and mortality of murine sepsis. *Infect Immunity* 1996; 64:4733-8

23. Sekut L, Champion BR, Page K, Menius JA Jr, Connolly KM: Anti-inflammatory activity of salmeterol: Down-regulation of cytokine production. *Clin Exp Immunol* 1995; 99:461-6

24. Berendes E, Mollhoff T, Van Aken H, Schmidt C, Erren M, Deng MC, Weyand M, Loick HM: Effects of dexamine on creatinine clearance, systemic inflammation, and splanchnic oxygenation in patients undergoing coronary artery bypass grafting. *Anesth Analg* 1997; 84:950-7

25. Sekut L, Yarnall D, Stimpson SA, Noel LS, Bateman-Fite R, Clark RL, Brackeen MF, Menius JA Jr, Connolly KM: Anti-inflammatory activity of phosphodiesterase (PDE)-IV inhibitors in acute and chronic models of inflammation. *Clin Exp Immunol* 1995; 100:126-32

26. Nakamura A, Johns EJ, Imaizumi A, Abe T, Kohsaka T: Regulation of tumour necrosis factor and interleukin-6 gene transcription by beta2-adrenoceptor in the rat astrocytes. *J Neuroimmunol* 1998; 88:144-53

27. Jaffe JS, Glaum MC, Raible DG, Post TJ, Dimitry E, Govindarao D, Wang Y, Schulman ES: Human lung mast cell IL-5 gene and protein expression: temporal analysis of upregulation following IgE-mediated activation. *Am J Respir Cell Mol Biol* 1995; 13:665-75

28. Hetier E, Ayala J, Bousseau A, Prochiantz A: Modulation of interleukin-1

and tumor necrosis factor expression by beta-adrenergic agonists in mouse ameboid microglial cells. *Exp Brain Res* 1991; 86:407-13

29. Heijnen CJ, Rouppe van der Voort C, Wulffraat N, van der Net J, Kuis W, Kavelaars A: Functional alpha 1-adrenergic receptors on leukocytes of patients with polyarticular juvenile rheumatoid arthritis. *J Neuroimmunol* 1996; 71:223-6

30. Spengler RN, Chensue SW, Giacherio DA, Blenk N, Kunkel SL: Endogenous norepinephrine regulates tumor necrosis factor-alpha production from macrophages in vitro. *J Immunol* 1994; 152:3024-31

31. Spengler RN, Allen RM, Remick DG, Strieter RM, Kunkel SL: Stimulation of alpha-adrenergic receptor augments the production of macrophage-derived tumor necrosis factor. *J Immunol* 1990; 145:1430-4

32. van der Poll T, Coyle SM, Barbosa K, Braxton CC, Lowry SF: Epinephrine inhibits tumor necrosis factor-alpha and potentiates interleukin 10 production during human endotoxemia. *J Clin Invest* 1996; 97:713-9

33. Suberville S, Bellocq A, Fouqueray B, Philippe C, Lantz O, Perez J, Baud L: Regulation of interleukin-10 production by beta-adrenergic agonists. *Eur J Immunol* 1996; 26:2601-5

34. Bailly S, Ferrua B, Fay M, Gougerot-Pocidalo MA: Differential regulation of IL 6, IL 1 A, IL 1 beta and TNF alpha production in LPS-stimulated human monocytes: Role of cyclic AMP. *Cytokine* 1990; 2:205-10

35. Hasko G, Elenkov IJ, Kvetan V, Vizi ES: Differential effect of selective block of alpha 2-adrenoreceptors on plasma levels of tumour necrosis factor-alpha, interleukin-6 and corticosterone induced by bacterial lipopolysaccharide in mice. *J Endocrinol* 1995; 144:457-62
